# Supplementary material
Source: MDPI journal article supplement (https://www.mdpi.com/2071-1050/13/19/10558)
Supplement: s1 [file s1]

**Table S1.** Pearson correlation coefficient (*r*-values, *n* = 48) between heavy metals in *Vossia cuspidata* organs and some sediment variables.

| Plant Heavy Metals<br>(mg/kg) | pH    | OM (%) | Silt (%) | Clay (%) | Sediment Heavy Metals (mg/kg) |       |       |       |        |        |  |
|-------------------------------|-------|--------|----------|----------|-------------------------------|-------|-------|-------|--------|--------|--|
|                               |       |        |          |          | Fe                            | Mn    | Zn    | Cu    | Ni     | Pb     |  |
| Roots                         |       |        |          |          |                               |       |       |       |        |        |  |
| Fe                            | 0.10  | -0.22  | 0.34     | 0.00     | 0.22                          | 0.42  | 0.19  | 0.15  | -0.27  | -0.28  |  |
| Mn                            | -0.50 | 0.04   | -0.31    | 0.09     | 0.21                          | 0.03  | 0.31  | -0.08 | 0.18   | 0.17   |  |
| Zn                            | -0.48 | 0.04   | 0.29     | 0.00     | 0.11                          | -0.08 | 0.23  | -0.03 | 0.35   | 0.33   |  |
| Cu                            | 0.28  | 0.20   | 0.00     | 0.23     | -0.13                         | 0.02  | -0.18 | 0.36  | -0.31  | -0.31  |  |
| Ni                            | -0.19 | 0.10   | 0.22     | -0.23    | -0.15                         | 0.18  | -0.20 | -0.21 | 0.10   | 0.09   |  |
| Pb                            | -0.17 | 0.13   | 0.21     | -0.24    | -0.14                         | 0.16  | -0.22 | -0.18 | 0.12   | 0.11   |  |
| Rhizomes                      |       |        |          |          |                               |       |       |       |        |        |  |
| Fe                            | 0.05  | 0.45   | -0.03    | 0.06     | 0.07                          | -0.18 | -0.11 | -0.05 | 0.59*  | 0.60*  |  |
| Mn                            | 0.01  | 0.47   | 0.39     | 0.10     | 0.07                          | -0.26 | 0.01  | 0.22  | 0.57*  | 0.56*  |  |
| Zn                            | 0.01  | -0.01  | 0.24     | 0.27     | -0.13                         | 0.06  | -0.04 | 0.54* | -0.07  | -0.10  |  |
| Cu                            | 0.33  | -0.27  | -0.16    | -0.20    | 0.15                          | 0.36  | -0.23 | 0.16  | -0.38  | -0.35  |  |
| Ni                            | 0.14  | 0.21   | 0.06     | 0.01     | -0.34                         | -0.27 | -0.30 | -0.26 | 0.17   | 0.18   |  |
| Pb                            | 0.15  | 0.19   | 0.05     | -0.01    | -0.32                         | -0.24 | -0.30 | -0.28 | 0.14   | 0.16   |  |
| Leaves                        |       |        |          |          |                               |       |       |       |        |        |  |
| Fe                            | -0.14 | 0.43   | 0.03     | -0.04    | -0.35                         | -0.14 | -0.24 | -0.27 | 0.59*  | 0.59*  |  |
| Mn                            | 0.02  | -0.39  | 0.24     | -0.12    | 0.20                          | 0.35  | 0.14  | -0.05 | -0.46  | -0.46  |  |
| Zn                            | -0.43 | 0.52*  | 0.08     | 0.15     | -0.21                         | -0.26 | -0.05 | -0.14 | 0.82** | 0.80** |  |
| Cu                            | 0.26  | -0.07  | 0.14     | 0.24     | 0.17                          | -0.29 | -0.18 | 0.25  | -0.3   | -0.3   |  |
| Ni                            | -0.51 | 0.35   | 0.25     | 0.02     | -0.03                         | -0.17 | 0.28  | -0.22 | 0.70** | 0.68** |  |
| Pb                            | -0.50 | 0.39   | 0.24     | 0.10     | -0.03                         | -0.24 | 0.29  | -0.14 | 0.70** | 0.68** |  |
| Stems                         |       |        |          |          |                               |       |       |       |        |        |  |
| Fe                            | -0.04 | 0.13   | 0.0      | -0.1     | 0.34                          | -0.03 | 0.34  | 0.05  | 0.24   | 0.24   |  |
| Mn                            | 0.20  | -0.13  | 0.1      | 0.0      | 0.13                          | 0.11  | -0.06 | 0.17  | -0.42  | -0.42  |  |
| Zn                            | 0.12  | -0.02  | 0.2      | -0.2     | 0.00                          | -0.04 | 0.13  | -0.19 | -0.12  | -0.12  |  |
| Cu                            | 0.08  | 0.41   | -0.1     | -0.1     | -0.24                         | -0.22 | -0.22 | -0.20 | 0.49*  | 0.49   |  |
| Ni                            | 0.06  | 0.18   | 0.2      | -0.1     | 0.20                          | -0.24 | 0.06  | -0.11 | 0.51*  | 0.51*  |  |
| Pb                            | 0.04  | 0.20   | 0.3      | -0.1     | 0.17                          | -0.23 | 0.04  | -0.09 | 0.51*  | 0.51*  |  |

\*,  $p < 0.05$ , \*\*,  $p < 0.01$ , \*\*\*,  $p < 0.001$ , OM: organic matter content.
